# Supplementary material
Source: PubMed Central journal article supplement (PMC7671628)
Supplement: ocaa166_supplementary_data.pdf [file ocaa166_supplementary_data.pdf]

| Concept                                   | Synonyms                                                                   | Definitions                                                                                                  | LOINC Code | LOINC Name                            | SCT ID    | SCT Term                                     |
|-------------------------------------------|----------------------------------------------------------------------------|--------------------------------------------------------------------------------------------------------------|------------|---------------------------------------|-----------|----------------------------------------------|
| Genitourinary Within Defined Limits (WDL) | Synonyms                                                                   | No problems with voiding, urine, genitalia associated with voiding, nor any GU devices present               | 80335-3    | Genitourinary Assessment (Impression) |           |                                              |
| Within Defined Limits (WDL)               |                                                                            |                                                                                                              | LA25085-4  | WDL                                   |           |                                              |
| WDL Except                                |                                                                            |                                                                                                              |            |                                       |           |                                              |
|                                           |                                                                            |                                                                                                              |            |                                       |           |                                              |
| Voiding Assessment                        | Synonyms                                                                   | Assessment of the patient's ability to eliminate urine                                                       |            |                                       |           |                                              |
|                                           |                                                                            |                                                                                                              |            |                                       |           |                                              |
| Voiding Characteristics                   | Changes in voiding patterns<br>Alterations in voiding<br>Voiding signs and | Signs (objective data) or symptoms (subjective experience) of a genitourinary disease or change in condition | 80332-0    | Voiding Pattern                       |           |                                              |
| Acute pain (abdomen, pelvis, back)        |                                                                            | Use pain assessment concepts                                                                                 |            |                                       |           |                                              |
| Anuria                                    |                                                                            | Nonpassage of urine, in practice is defined as passage of less than 100 milliliters of urine in a day        | LA25308-0  | Anuria                                | 2472002   | Anuria (finding)                             |
| Bladder distension                        |                                                                            | Volume > 500–600 ml                                                                                          |            |                                       | 54768000  | Bladder distention (finding)                 |
| Bladder fullness                          | Sensation of fullness a                                                    | Persistent and strong desire to urinate without the fear of losing urine                                     |            |                                       | 247335009 | Sensation as if bladder still full (finding) |
| Bladder spasm                             |                                                                            | Bladder muscle squeezes suddenly without warning, causing an urgent need to release urine.                   |            |                                       | 16844001  | Painful urging to urinate (finding)          |
| Dribbling                                 | Post Micturition Dribble                                                   | Uncontrolled leakage of urine.                                                                               | LA25310-6  | Dribbling                             | 58972000  | Dribbling of urine                           |
| Dysuria                                   | Painful, Burning,                                                          | Pain, discomfort, or burning when                                                                            | LA17661-2  | Dysuria                               | 49650001  | Dysuria (finding)                            |

|                    |                                             |                                                                                                                                          |           |                             |                     |                                                                          |
|--------------------|---------------------------------------------|------------------------------------------------------------------------------------------------------------------------------------------|-----------|-----------------------------|---------------------|--------------------------------------------------------------------------|
| Enuresis           | Wetting/ involuntary urination at night     | loss of bladder control in children 3 and older                                                                                          | LA25319-7 | enuresis                    | 42112009            | Urinary incontinence of non-organic origin (finding) -- enuresis         |
| Frequency          | Increased daytime frequency                 | Urinating often during the day                                                                                                           | LA25315-5 | Increased urinary frequency | 162116003           | Increased frequency of urination (finding)                               |
| Hesitancy          | Difficulty starting stream, strains to void | Trouble starting or maintaining a urine stream                                                                                           | LA25309-8 | Hesitancy                   | 5972002             | Delay when starting to pass urine (finding) -- synonym urinary hesitancy |
| Incontinence       | Urinary incontinence/involuntary urination  | Loss of bladder control                                                                                                                  | LA7445-5  | Incontinence                | 48340000            | Incontinence (finding)                                                   |
| Lacks urge to void |                                             | A decrease in the sensation of needing to void                                                                                           |           |                             |                     |                                                                          |
| Nocturia           | Excessive night time urination              | Waking up at night 2+ times                                                                                                              | LA25318-9 | Nocturia                    | 139394000           | Nocturia (finding)                                                       |
| Oliguria           | Low output of urine                         | Urine output < 1 mL/kg/h in infants, < 0.5 mL/kg/h in children, and < 400 mL or 500 mL per 24h in adults - this equals 17 or 21 mL/hour. | LA25321-3 | Oliguria                    | 83128009            | Oliguria (finding)                                                       |
| Polyuria           | Excessive urination                         | > 3 Liters / day                                                                                                                         | LA25323-9 | Polyuria                    | 28442001            | Polyuria (finding)                                                       |
| Retention          | Absence of urinary elimination              | Inability to completely or partially empty the bladder                                                                                   |           |                             | 130951007           | Bladder retention of urine (observable                                   |
| Unable to void     |                                             | Inability to urinate                                                                                                                     | LA25325-4 | Unable to void              | 44949100012<br>4101 | Unable to void urine (finding)                                           |
| Urgency            | Overactive bladder                          | Sudden, compelling urge to urinate                                                                                                       | LA25327-0 | Urgency                     | 75088002            | Urgent desire to urinate (finding)                                       |
|                    |                                             |                                                                                                                                          |           |                             |                     |                                                                          |

|                                 |          |                                                                                                                                                   |  |  |           |                                           |
|---------------------------------|----------|---------------------------------------------------------------------------------------------------------------------------------------------------|--|--|-----------|-------------------------------------------|
| Bladder Scan (mL)               |          | Amount of urine in the bladder after voiding, normal < 100 mL                                                                                     |  |  |           |                                           |
| Numeric Value                   |          |                                                                                                                                                   |  |  |           |                                           |
|                                 |          |                                                                                                                                                   |  |  |           |                                           |
| Urinary Incontinence Assessment | Synonyms | Assessment of issues that influence incontinence which is the involuntary loss of urine in sufficient quantities as to be a problem               |  |  |           |                                           |
|                                 |          |                                                                                                                                                   |  |  |           |                                           |
| Urinary Incontinence Type       |          | Underlying causes and patterns of involuntary loss of urine                                                                                       |  |  |           |                                           |
| Functional                      |          | Involuntary loss of urine due to non-genitourinary functional deficits including altered mobility, dexterity, cognitive or environmental barriers |  |  | 129847007 | Functional urinary incontinence (finding) |

|                             |                    |                                                                                                                                                                                                                                                                                                                                                                                                                                                                                                                                                            |  |  |                  |                                          |
|-----------------------------|--------------------|------------------------------------------------------------------------------------------------------------------------------------------------------------------------------------------------------------------------------------------------------------------------------------------------------------------------------------------------------------------------------------------------------------------------------------------------------------------------------------------------------------------------------------------------------------|--|--|------------------|------------------------------------------|
| Mixed                       |                    | Experiences more than one type of urinary incontinence i.e. stress and urge. is the complaint of involuntary leakage associated with urgency and also with exertion, effort, sneezing or coughing.                                                                                                                                                                                                                                                                                                                                                         |  |  | 413343005        | Mixed incontinence (finding)             |
| Overflow                    |                    | Involuntary loss of urine associated with bladder over-distention caused by under-active detrusor muscle or outlet obstruction. Conceptual:Complaints of involuntary loss of urine that occurs underconditions in Incontinence associated with which the bladder was not completely emptied, what can be related to high residual volume after urination and/or not painful bladder, which is palpable or maltreated after urination (Staskin et al., 2013). Operational: Note or report of extravasation of urine due to excessive volume in the bladder. |  |  | 397878005        | Overflow incontinence of uring (finding) |
| Stress                      |                    | Involuntary loss of urine with activities that increase intra-abdominal pressure (e.g. coughing, sneezing, etc.)                                                                                                                                                                                                                                                                                                                                                                                                                                           |  |  | 22220005         | Genuine stress incontinence (finding)    |
| Urge                        | Overactive bladder | involuntary loss of urine with a strong urge to void. is the complaint of involuntary leakage accompanied by or immediately preceded by urgency.                                                                                                                                                                                                                                                                                                                                                                                                           |  |  | 87557004         | Urge incontinence of urine (finding)     |
|                             |                    |                                                                                                                                                                                                                                                                                                                                                                                                                                                                                                                                                            |  |  |                  |                                          |
| Urinary Incontinence Status |                    | Current state of presence of urinary incontinence                                                                                                                                                                                                                                                                                                                                                                                                                                                                                                          |  |  | Use one of above |                                          |
| Active                      |                    | Use existing code for type (above)                                                                                                                                                                                                                                                                                                                                                                                                                                                                                                                         |  |  |                  |                                          |
| Resolved                    |                    | This needs discussion                                                                                                                                                                                                                                                                                                                                                                                                                                                                                                                                      |  |  |                  |                                          |

|                                   |                    |                                                              |  |  |           |                                                             |
|-----------------------------------|--------------------|--------------------------------------------------------------|--|--|-----------|-------------------------------------------------------------|
|                                   |                    |                                                              |  |  |           |                                                             |
| Frequency of Urinary Incontinence | Urinary Occurrence | Frequency or incidence of occurrence of urinary incontinence |  |  | 422058003 | Number of urinary incontinence episodes (observable entity) |
| Once a day or less                |                    |                                                              |  |  |           |                                                             |
| 1-2 times a day                   |                    |                                                              |  |  |           |                                                             |
| 3 times a day or more             |                    |                                                              |  |  |           |                                                             |
|                                   |                    |                                                              |  |  |           |                                                             |
| When Urinary Incontinence Occurs  | Urinary Occurrence | The time of day/night when urinary incontinence occurs       |  |  |           |                                                             |
| Daytime only                      |                    |                                                              |  |  | 28017001  | Daytime (qualifier value)                                   |
| Nighttime only                    |                    |                                                              |  |  | 2546009   | Night time (qualifier value)                                |
| Both day and night                |                    |                                                              |  |  | 224943009 | Night and day (qualifier value)                             |
|                                   |                    |                                                              |  |  |           |                                                             |
| Urinary Incontinence Onset        |                    | The length of time for the start of UI                       |  |  |           |                                                             |
| Gradual                           |                    |                                                              |  |  | 61751001  | Gradual onset (qualifier value)                             |
| Sudden                            |                    |                                                              |  |  | 385315009 | Sudden onset (qualifier value)                              |
|                                   |                    |                                                              |  |  |           |                                                             |

|                                      |               |                                                                                                |           |                                  |                     |                                        |
|--------------------------------------|---------------|------------------------------------------------------------------------------------------------|-----------|----------------------------------|---------------------|----------------------------------------|
| Urinary Incontinence Duration        |               | Subjective estimate of how long the urinary incontinence has been occurring                    | 64748-7   | Symptoms Duration (PhenX--TRIAL) | 162442009           | Time symptom lasts (observable entity) |
| < 6 months                           |               |                                                                                                |           |                                  |                     |                                        |
| 6 months to 1 year                   |               |                                                                                                |           |                                  |                     |                                        |
| > 1 year                             |               |                                                                                                |           |                                  |                     |                                        |
| Unknown                              |               |                                                                                                |           |                                  |                     |                                        |
|                                      |               |                                                                                                |           |                                  |                     |                                        |
| Urine Assessment                     | Synonyms      | Assessment of urine - both the quality and quantity                                            |           |                                  |                     |                                        |
|                                      |               |                                                                                                |           |                                  |                     |                                        |
| Urine Characteristics                | Synonyms      | Quality of urine (content, color, and odor)                                                    |           |                                  |                     |                                        |
|                                      |               |                                                                                                |           |                                  |                     |                                        |
| Urine Characteristics: Urine Content | Urine Content | Definitions: Refers to how clear the urine is.                                                 |           |                                  |                     |                                        |
| Blood clots                          |               | Clumps of blood in urine                                                                       | LA25774-3 | Clots                            |                     |                                        |
| Clear                                | Appearance    | Urine is free from particles, transparent                                                      | LA19732-9 | Clear                            | 167236000           | Urine looks clear (finding)            |
| Cloudy                               | Turbidity     | Visible particles or material in urine                                                         | LA19733-7 | Cloudy                           | 7766007             | Cloudy urine (finding)                 |
| Foamy                                | Frothy        | Appearance and persistence of multiple layers of small to medium white bubbles in voided urine |           |                                  | 44947100012<br>4102 | Urine consistency frothy               |
| Mucous                               |               | Presence of mucous or mucous threads in urine                                                  | LA25329-6 | Mucous threads                   | 276409005           | mucus in urine (finding)               |
| Purulent                             |               | Whitish color to urine                                                                         |           |                                  |                     |                                        |
| Red flecks                           |               | Red blood cells in urine                                                                       |           |                                  |                     |                                        |
| Sediment                             | Deposit       | Matter in urine                                                                                | LA25331-2 | Sediment                         | 102846009           | Urinary sediment (dfinding)            |
| Stones                               | Calculi       | Hard masses of minerals in urine                                                               | LA25330-4 | Stones                           | 276408002           | stone in urine (finding)               |

|                                       |                        |                                                                                                                                                                                                                 |        |                |                     |                                |
|---------------------------------------|------------------------|-----------------------------------------------------------------------------------------------------------------------------------------------------------------------------------------------------------------|--------|----------------|---------------------|--------------------------------|
|                                       |                        |                                                                                                                                                                                                                 |        |                |                     |                                |
| Urine Characteristics:<br>Urine Color |                        | Urine is a transparent (clear) fluid or freshly voided urine is light yellow or amber in color.                                                                                                                 | 5778-6 | Color of Urine | 102867009           | Discolored urine (finding)     |
| Amber                                 |                        | Normal color for urine caused by a pigment called urochrome, possible dehydration                                                                                                                               |        |                | 44913100012<br>4105 | amber colored urine (finding)  |
| Blue                                  |                        | Blue urine is typically caused by Methylene blue ingestion[                                                                                                                                                     |        |                | 44911100012<br>4104 | blue colored urine (finding)   |
| Brown                                 |                        | Discoloration can stem from numerous causes of red urine. Old clot sediment can appear brown when suspended in urine of a certain concentration. Likewise, myoglobinuria and hemoglobinuria often appear brown. |        |                | 44910100012<br>4102 | brown colored urine (finding)  |
| Dark red                              | Hematuria, red or pink | Red includes the colors like pink; shades of red, brown orange or even black depending upon who views the sample.                                                                                               |        |                |                     |                                |
| Green                                 |                        | Urine discoloration can also produce a green urine hue when combined with the yellow color urochrome produces.                                                                                                  |        |                | 44909100012<br>4108 | green colored urine (finding)  |
| Orange                                |                        | Orange urine discoloration results from medication use                                                                                                                                                          |        |                | 44908100012<br>4105 | orange colored urine (finding) |
| Pale yellow                           | Straw                  | Normal color for urine caused by a pigment called urochrome , well-hydrated                                                                                                                                     |        |                | 44903100012<br>4109 | straw colored urine (finding)  |
| Pink                                  |                        | Pink color to urine, may be caused by eating beets, blueberries or rhubarb                                                                                                                                      |        |                | 44907100012<br>4107 | pink colored urine (finding)   |

|                                      |                         |                                                                                                                                                                                                                                                                                                                                             |         |               |                     |                                    |
|--------------------------------------|-------------------------|---------------------------------------------------------------------------------------------------------------------------------------------------------------------------------------------------------------------------------------------------------------------------------------------------------------------------------------------|---------|---------------|---------------------|------------------------------------|
| Red                                  | Bloody, dark red, hema  | Red urine discoloration due to hemoglobinuria may present in hemolytic disorders, as in "march hematuria" observed in troops.ed urine can range in intensity from a pink lemonade color (clear light pink) to that of tomato soup (active thick bleeding) to a deep opaque merlot color (liquefying clot). Hematuria, or blood in the urine |         |               | 44905100012<br>4102 | red colored urine (finding)        |
| Rusty                                |                         | Dark orange or brown color, may be a possible symptom of jaundice, rhabdohyolysis or dehydration                                                                                                                                                                                                                                            |         |               | 44925100012<br>4106 | rusty colored urine (finding)      |
| Yellow                               |                         | Normal color for urine caused by a pigment called urochrome and how diluted or concentrated the urine is                                                                                                                                                                                                                                    |         |               | 162134004           | urine looks normal (finding)       |
|                                      |                         |                                                                                                                                                                                                                                                                                                                                             |         |               |                     |                                    |
| Urine Characteristics:<br>Urine Odor | Urine Odor              | Refers to the smell from your urine                                                                                                                                                                                                                                                                                                         | 34533-0 | Odor of Urine | 10579003            | Finding of odor of urine (finding) |
| Ammonia                              |                         | smell of ammonia                                                                                                                                                                                                                                                                                                                            |         |               | 167248002           | urine smells ammoniacal (finding)  |
| Fecal odor                           |                         | smell of feces                                                                                                                                                                                                                                                                                                                              |         |               |                     |                                    |
| Fruity                               | Sweet smelling urine (f | smells sweet or like fruit                                                                                                                                                                                                                                                                                                                  |         |               | 773318006           | sweet smelling urine (finding)     |
| Malodorous                           | Malodorous urine (find  | smells unpleasant or foul                                                                                                                                                                                                                                                                                                                   |         |               | 278017001           | malodorous urine (finding)         |
|                                      |                         |                                                                                                                                                                                                                                                                                                                                             |         |               |                     |                                    |
| Urine Output                         | Urine Output            | The amount of urine excreted by the kidney usually measured in mL                                                                                                                                                                                                                                                                           |         |               |                     |                                    |
| Urine Output (mL)                    |                         |                                                                                                                                                                                                                                                                                                                                             | 9187-6  | Urine Output  |                     |                                    |
|                                      |                         |                                                                                                                                                                                                                                                                                                                                             |         |               |                     |                                    |



|                                             |                        |                                                                                                                                                        |        |                                             |           |                                     |
|---------------------------------------------|------------------------|--------------------------------------------------------------------------------------------------------------------------------------------------------|--------|---------------------------------------------|-----------|-------------------------------------|
| Unmeasured Urine Output                     |                        | Indirect methods to measure urine Used for unmeasured urine output (e.g. incontinence or unable to measure (missed the collection device but did void) |        |                                             |           |                                     |
| Unmeasured Output: Urine Occurrence (Count) |                        | Count of the frequency of incontinence episodes                                                                                                        |        |                                             | 252109000 | Number of times (qualifier value)   |
| Unmeasured Output: Diapers/ Pads (Number)   |                        | The number of diapers or pads counted as a measure of urine output                                                                                     |        |                                             |           |                                     |
| Unmeasured Output: Diaper Weight            |                        | Wet diaper weight - dry diaper weight measured in grams and translated to milliliters (1 gram = 1 ml)                                                  | 9185-0 | Fluid output urinary incontinence Estimated |           |                                     |
|                                             |                        |                                                                                                                                                        |        |                                             |           |                                     |
| <b>Genitalia Assessment</b>                 | <b>Synonyms</b>        | <b>Assessment of genitalia associated with or influencing urination</b>                                                                                |        |                                             |           |                                     |
|                                             |                        |                                                                                                                                                        |        |                                             |           |                                     |
| Genitalia Assessment                        |                        | Assessment of genitalia associated with or influencing urination                                                                                       |        |                                             |           |                                     |
| Bleeding                                    |                        | release of blood from the circulatory system                                                                                                           |        |                                             | 131148009 | Bleeding (finding)                  |
| Discharge                                   | penile, vaginal        | flow of substance from where it has been confined                                                                                                      |        |                                             | 307488001 | Discharge - substance (substance)   |
| Discomfort                                  | pain                   | Use pain assessment concepts                                                                                                                           |        |                                             |           |                                     |
| Enlarged scrotum                            | Scrotal swelling       | Swelling or edema of the scrotum                                                                                                                       |        |                                             | 271687003 | Swelling of Scrotum (finding)       |
| Excoriation                                 | Abrasion, scratching   | damaged part of the surface of the skin                                                                                                                |        |                                             | 723016004 | Acute excoriation of skin (finding) |
| Itching                                     | Irritation or pruritis | experience an itch                                                                                                                                     |        |                                             | 418290006 | Itching (finding)                   |

|                           |                 |                                                                                                                                                                                                                             |           |                 |           |                                       |
|---------------------------|-----------------|-----------------------------------------------------------------------------------------------------------------------------------------------------------------------------------------------------------------------------|-----------|-----------------|-----------|---------------------------------------|
| Lesions                   |                 | a region in an organ or tissue which has suffered damage through injury or disease, such as a wound, ulcer, abscess, or tumor                                                                                               |           |                 | 300582001 | Multiple lesions (finding)            |
| Mass                      | Lump            | a coherent, typically large body of matter with no definite shape                                                                                                                                                           |           |                 | 300848003 | Mass of body structure (finding)      |
| Rash                      |                 | an area of reddening of a person's skin, sometimes with raised spots, appearing especially as a result of allergy or illness                                                                                                |           |                 | 827160004 | Rash (finding)                        |
| Redness                   |                 | the quality or state of being red or reddish                                                                                                                                                                                |           |                 | 386713009 | Redness (finding)                     |
| Swelling                  |                 | an abnormal enlargement of a part of the body (not edema)                                                                                                                                                                   |           |                 | 65124004  | Swelling (finding)                    |
|                           |                 |                                                                                                                                                                                                                             |           |                 |           |                                       |
| GU Device Assessment      | Synonyms        | Assessment criteria related to use of a medical product that can be invasive or non-invasive intended for care or treatment of a GU condition.                                                                              |           |                 |           |                                       |
|                           |                 |                                                                                                                                                                                                                             |           |                 |           |                                       |
| GU Device Type            |                 | Observation at a point in time of a type of medical product that can be invasive or non-invasive intended for the care or treatment of GU condition.                                                                        |           |                 |           |                                       |
| Coude                     |                 | A type of indwelling urinary catheter which has a slightly angled or curved tip and is used for patients where it is difficult to insert a regular straight tip catheter.                                                   |           |                 |           |                                       |
| External urinary catheter | Condom catheter | Catheter placed outside the body, typically for men. A device that looks like a condom covers the penis head and a tube leads from the condom device to a drainage bag. An external urinary catheter also exists for women. | LA25314-8 | Condom Catheter | 337636000 | Incontinence sheath (physical object) |

|                             |                                   |                                                                                                                                                                                                                                                                                                                                                                                                                                                                                    |           |          |           |                                                                        |
|-----------------------------|-----------------------------------|------------------------------------------------------------------------------------------------------------------------------------------------------------------------------------------------------------------------------------------------------------------------------------------------------------------------------------------------------------------------------------------------------------------------------------------------------------------------------------|-----------|----------|-----------|------------------------------------------------------------------------|
| Indwelling urinary catheter | Urethral catheter, double balloon | A soft plastic, silicone or rubber tube with a balloon attached that is inflated to keep the catheter in place in the bladder. The catheter is inserted through the urethra and is used to decompress a distended bladder, collect urine, and monitor patient urine output                                                                                                                                                                                                         |           |          | 23973005  | Indwelling urinary catheter, device (physical object)                  |
| Intermittent catheter       | Straight catheter                 | A small hollow, flexible tube that is used to empty urine from the bladder intermittently                                                                                                                                                                                                                                                                                                                                                                                          |           |          | 470027009 | Intermittent urethral drainage catheter, non-sterile (physical object) |
| Nephrostomy                 |                                   | Catheter (simple angiographic, pigtail, or self-retaining) placed percutaneously or surgically for external drainage of the renal collecting system in a patient with a high-grade urinary tract obstruction, provision of an access route for placement of a ureteral stent, provision of a route for extraction of a renal or ureteral calculus, treatment of a urinary tract infection superimposed on a urinary obstruction, or treatment of urinary tract leaks and fistulas. |           |          | 286628000 | Nephrostomy tube (physical object)                                     |
| Ureteral catheter           |                                   | Catheter that is designed to be placed to aid access for delivery of contrast or a guidewire                                                                                                                                                                                                                                                                                                                                                                                       |           |          | 47528002  | Ureteral catheter, device (physical object)                            |
| Urostomy                    | Pouch, Ostomy (urine)             | Surgically created opening to drain urine after the bladder has been removed or bypassed.                                                                                                                                                                                                                                                                                                                                                                                          | LA25328-8 | Urostomy | 344088002 | Urostomy bag (physical object)                                         |

|                                                    |  |                                                                                                                                                                                                      |           |                     |               |                                                                                |
|----------------------------------------------------|--|------------------------------------------------------------------------------------------------------------------------------------------------------------------------------------------------------|-----------|---------------------|---------------|--------------------------------------------------------------------------------|
| Suprapubic                                         |  | Indwelling urinary catheter which is placed surgically or percutaneously in the abdomen and are typically sewn in place and attached to a drainage bag. Usually used for long-term urinary drainage. | LA25324-7 | Suprapubic catheter | 286861005     | Suprapubic catheter (physical object)                                          |
| Triple lumen urinary catheter                      |  | Catheter with a third channel which is used for continuous bladder irrigation or for instillation of medication. Also called a 3 way catheter.                                                       |           |                     | 470611003     | Indwelling urethral drainage/irrigation catheter (physical object)             |
| Temperature monitoring urinary catheter            |  | Indwelling urinary catheter which has a electrically insulated thermistor probe in a secondary lumen with a sensor near the tip of the catheter to monitor the patient's urine (body) temperature.   |           |                     | 466565001     | Temperature-monitoring indwelling urethral drainage catheter (physical object) |
|                                                    |  |                                                                                                                                                                                                      |           |                     |               |                                                                                |
| GU Device Pre-existing Device Present On Admission |  | A GU device is present on admission to a hospital or other type of health care organization                                                                                                          |           |                     | 3881000175103 | Clinical finding present on admission (situation)                              |
| Yes                                                |  |                                                                                                                                                                                                      |           |                     |               |                                                                                |
| No                                                 |  |                                                                                                                                                                                                      |           |                     |               |                                                                                |
|                                                    |  |                                                                                                                                                                                                      |           |                     |               |                                                                                |
| GU Device Placed at Location/ Organization         |  | Location or an organization where patient was when a GU device was placed                                                                                                                            |           |                     |               |                                                                                |
| Outside facility                                   |  |                                                                                                                                                                                                      |           |                     |               |                                                                                |
| Outside hospital                                   |  |                                                                                                                                                                                                      |           |                     |               |                                                                                |
| Home (self-cathing)                                |  |                                                                                                                                                                                                      |           |                     |               |                                                                                |
| EMS                                                |  |                                                                                                                                                                                                      |           |                     |               |                                                                                |
| Current facility                                   |  |                                                                                                                                                                                                      |           |                     |               |                                                                                |
| Unknown                                            |  |                                                                                                                                                                                                      |           |                     |               |                                                                                |

|                                     |  |                                                                                                |         |                         |           |                                                 |
|-------------------------------------|--|------------------------------------------------------------------------------------------------|---------|-------------------------|-----------|-------------------------------------------------|
| Pre-existing Insertion Date         |  | fuzzy date (less than complete date) of catheter insertion                                     |         |                         |           |                                                 |
| Use Fuzzy date                      |  |                                                                                                |         |                         |           |                                                 |
| Insertion Date/ Time this encounter |  | calendar date and time of catheter insertion                                                   |         |                         |           |                                                 |
| Date /Time                          |  |                                                                                                | 72052-4 | Date catheter placement |           |                                                 |
| Inserted by                         |  | Department where patient was located when a GU device was inserted                             |         |                         |           |                                                 |
| Cath lab                            |  | Department in a hospital where interventional cardiac procedures are performed                 |         |                         |           |                                                 |
| Dialysis unit                       |  | Department in a hospital where hemodialysis is performed                                       |         |                         | 418518002 | Dialysis unit (environment)                     |
| Emergency department                |  | Department in a hospital where emergency care is provided                                      |         |                         | 225728007 | Accident and Emergency department (environment) |
| Emergency medical services          |  | Pre-hospital care staff who provide emergency services                                         |         |                         | 409971007 | Emergency medical services (qualifier value)    |
| Infusion room                       |  | Department in a hospital or clinic where infusions are administered to patients                |         |                         |           | request code                                    |
| Inpatient unit                      |  | Department in a hospital where patients are treated                                            |         |                         | 440654001 | Inpatient environment (environment)             |
| Operating room                      |  | Department in a hospital or clinic where operative and interventional procedures are performed |         |                         | 225738002 | Operating theatre (environment)                 |

|                                                                      |  |                                                                                                                                                                                                                                                                                       |  |  |           |                                                    |
|----------------------------------------------------------------------|--|---------------------------------------------------------------------------------------------------------------------------------------------------------------------------------------------------------------------------------------------------------------------------------------|--|--|-----------|----------------------------------------------------|
| Radiology                                                            |  | Department in a hospital or clinic where radiological studies are performed                                                                                                                                                                                                           |  |  | 309964003 | Radiology department (environment)                 |
|                                                                      |  |                                                                                                                                                                                                                                                                                       |  |  |           |                                                    |
| Reason for Device                                                    |  | Rationale for why a device was used.                                                                                                                                                                                                                                                  |  |  | 410665000 | Indication for (attribute)                         |
| Anesthesia                                                           |  | Patient is receiving anesthesia                                                                                                                                                                                                                                                       |  |  | 421642003 | Under anesthesia (finding)                         |
| Anticipated large-volume infusions or diuretics                      |  | Patient will be given large amounts of intravenous fluid or diuretics to increase urine output                                                                                                                                                                                        |  |  | 718402002 | Increased urine output (finding)                   |
| Assist in healing of perineal & sacral wounds in incontinent patient |  | Patient has perineal or sacral wounds with incontinence. The device is inserted to prevent the effects of incontinence and aid wound healing                                                                                                                                          |  |  | 183001000 | Incontinence care (regime/therapy)                 |
| Chemotherapy with incontinence                                       |  | Patient has urinary incontinence and is receiving chemotherapy                                                                                                                                                                                                                        |  |  | 183001000 | Incontinence care (regime/therapy)                 |
| Close urine output monitoring                                        |  | The patient's urinary output needs to be closely monitored by the treatment team to determine effectiveness of interventions and overall status                                                                                                                                       |  |  | 130953005 | Rate of urine output, function (observable entity) |
| End of life/ comfort care                                            |  | The patient is near the end of life and the device will prevent additional discomfort                                                                                                                                                                                                 |  |  | 385736008 | Dying care (regime/therapy)                        |
| Gross hematuria                                                      |  | The patient has blood in their urine which they can see                                                                                                                                                                                                                               |  |  | 197941005 | Frank hematuria (disorder)                         |
| Neurogenic bladder                                                   |  | A number of urinary conditions in people who lack bladder control due to a brain, spinal cord or nerve problem. Problems with these nerves cause overactive bladder (OAB), incontinence, and underactive bladder (UAB) or obstructive bladder, in which the flow of urine is blocked. |  |  | 398064005 | Neurogenic bladder (finding)                       |

|                                |                      |                                                                                     |         |                       |           |                                                |
|--------------------------------|----------------------|-------------------------------------------------------------------------------------|---------|-----------------------|-----------|------------------------------------------------|
| Obstruction                    |                      | The patient has an inability to void because of an obstruction in the urinary tract |         |                       | 7163005   | Urinary tract obstruction (disorder)           |
| Retention                      |                      | The patient retains urine after voiding                                             |         |                       | 130951007 | Bladder retention of urine (observable entity) |
| Post-surgical procedure        |                      | The patient has had a surgical procedure                                            |         |                       |           | do not code                                    |
| Transplant                     |                      | The patient has received a transplant                                               |         |                       | 77465005  | Transplantation (procedure)                    |
| Paralytic agents               |                      | The patient is receiving a paralytic agent                                          |         |                       |           | do not code                                    |
|                                |                      |                                                                                     |         |                       |           |                                                |
| Tube Size (Fr)                 |                      | Catheter outer diameter in millimeters--French scale                                |         |                       |           |                                                |
| Numeric                        |                      |                                                                                     |         |                       |           |                                                |
|                                |                      |                                                                                     |         |                       |           |                                                |
| Balloon Size (mL)              |                      | Catheter balloon size in milliliters                                                |         |                       |           |                                                |
| Numeric                        |                      |                                                                                     |         |                       |           |                                                |
|                                |                      |                                                                                     |         |                       |           |                                                |
| GU Device Collection Container |                      | Definition: Type of urine collection container                                      |         |                       |           |                                                |
| Belly bag                      |                      | Alternative to a leg bag, collects urine and is attached to the abdomen             |         |                       |           |                                                |
| Drainage bag                   | Urinary drainage bag | Bag used to collect urine                                                           |         |                       | 30968007  | Drainage bag, device (physical object)         |
| Leg bag                        |                      | Bag used to collect urine which is attached to the leg                              |         |                       | 338000001 | Leg bag (physical object)                      |
| Urostomy bag                   |                      | Bag used to collect urine from a urostomy                                           |         |                       | 344088002 | Urostomy bag (physical object)                 |
|                                |                      |                                                                                     |         |                       |           |                                                |
| Removal Date                   |                      | calendar date of catheter removal                                                   | 72051-6 | Date catheter removal |           |                                                |
| Date                           |                      |                                                                                     |         |                       |           |                                                |

|                             |           |                                                                                                                                                                       |  |  |           |                                          |
|-----------------------------|-----------|-----------------------------------------------------------------------------------------------------------------------------------------------------------------------|--|--|-----------|------------------------------------------|
|                             |           |                                                                                                                                                                       |  |  |           |                                          |
| Reason for Removal          |           | Reason for removal of device                                                                                                                                          |  |  |           |                                          |
| Device damaged              |           | Device has been damaged in some way so it no longer functions as expected                                                                                             |  |  |           |                                          |
| Therapy/treatment completed |           | The therapy or treatment that required the device has been completed                                                                                                  |  |  | 182992009 | Treatment completed (situation)          |
| No longer indicated         |           | The device is no longer needed and can be removed                                                                                                                     |  |  |           | request code                             |
| Occluded                    |           | The device is occluded and no longer functions as expected                                                                                                            |  |  | 263823007 | Occluded (qualifier value)               |
| Pain                        |           | The device is causing pain to the patient                                                                                                                             |  |  | 22253000  | Pain (finding)                           |
| Per patient/family request  |           |                                                                                                                                                                       |  |  |           | do not code                              |
| Per protocol                | Per order |                                                                                                                                                                       |  |  |           | do not code                              |
| Removed by patient          |           | Device has been removed by the patient                                                                                                                                |  |  |           |                                          |
| Suspected infection         | Infection | There is a suspected infection which may be related to or caused by the device                                                                                        |  |  | 473130003 | Suspected infectious disease (situation) |
|                             |           |                                                                                                                                                                       |  |  |           |                                          |
| Reason for Continuation     |           | Reason (necessity) for not removing Foley catheter                                                                                                                    |  |  |           |                                          |
| Accurate intake & output    |           | Measurement of a patient's fluid intake by mouth, feeding tubes, or intravenous catheters and output from kidneys, gastrointestinal tract, drainage tubes, and wounds |  |  | 63061008  | Measuring intake and output (procedure)  |
| Anesthesia                  |           | State of controlled, temporary loss of sensation or awareness that is induced for medical purposes.                                                                   |  |  | 421642003 | Under anesthesia (finding)               |



|                                                                      |  |                                                                                                                                                                                                            |  |  |           |                                                              |
|----------------------------------------------------------------------|--|------------------------------------------------------------------------------------------------------------------------------------------------------------------------------------------------------------|--|--|-----------|--------------------------------------------------------------|
| Assist in healing of perineal & sacral wounds in incontinent patient |  | Patient has perineal or sacral wounds with incontinence. The device is inserted to prevent the effects of incontinence and aid wound healing                                                               |  |  | 183001000 | Incontinence care (regime/therapy)                           |
| Comfort care/end of life                                             |  | Care to prevent or alleviate suffering near the end of life                                                                                                                                                |  |  | 385736008 | Dying care (regime/therapy)                                  |
| Continuous bladder irrigation                                        |  | Procedure used continuously to flush sterile fluid through your catheter and into your bladder                                                                                                             |  |  | 771555004 | Monitoring of continuous bladder irrigation (regime/therapy) |
| Epidural/intrathecal catheter                                        |  | Intrathecal administration is delivered directly into the CSF and into the superficial spinal cord; epidural administration diffuses through the dura into the CSF, and thus has a slower onset of action. |  |  | 30610008  | Epidural catheter, device (physical object)                  |
| Gross hematuria                                                      |  | Visible blood in urine                                                                                                                                                                                     |  |  | 197941005 | Frank hematuria (disorder)                                   |
| Immobilized patient                                                  |  | Decreased ability to move                                                                                                                                                                                  |  |  | 257884004 | Immobilization - action (qualifier value)                    |
| Incontinence                                                         |  | Involuntary leakage of urine                                                                                                                                                                               |  |  | 165232002 | Urinary incontinence (finding)                               |
| Known or suspected urinary tract obstruction                         |  | Blockage that inhibits the flow of urine through its normal path (the urinary tract), including the kidneys, ureters, bladder, and urethra. Blockage can be complete or partial.                           |  |  | 7163005   | Urinary tract obstruction (disorder)                         |
| Neurogenic bladder                                                   |  | Lack bladder control due to a brain, spinal cord or nerve problem                                                                                                                                          |  |  | 398064005 | Neurogenic bladder (finding)                                 |
| Paralytic agents                                                     |  | Blockage of neuromuscular transmission at the neuromuscular junction, causing paralysis of the affected skeletal muscles.                                                                                  |  |  |           | do not code                                                  |

|                                    |                 |                                                                                                                                                         |  |  |           |                                                 |
|------------------------------------|-----------------|---------------------------------------------------------------------------------------------------------------------------------------------------------|--|--|-----------|-------------------------------------------------|
| Retention                          |                 | Inability to empty bladder of all urine                                                                                                                 |  |  | 130951007 | Bladder retention of urine (observable entity)  |
| Per policy                         |                 | The patient meets criteria in an institution's policy to continue use of an indwelling urinary catheter                                                 |  |  |           | do not code                                     |
|                                    |                 |                                                                                                                                                         |  |  |           |                                                 |
| GU Device Ureter / Device Location |                 | Physical location of the device or body laterality of the device location                                                                               |  |  |           |                                                 |
| Left ureter                        |                 | ureter on the left side of the body                                                                                                                     |  |  | 26559004  | Structure of left ureter (body structure)       |
| Right ureter                       |                 | ureter on the left side of the body                                                                                                                     |  |  | 25308007  | Structure of right ureter (body structure)      |
|                                    |                 |                                                                                                                                                         |  |  |           |                                                 |
| Device Status                      |                 | State of a device related to intactness                                                                                                                 |  |  |           |                                                 |
| Clamped                            |                 | Device is clamped, allowing no drainage                                                                                                                 |  |  |           | request code                                    |
|                                    |                 |                                                                                                                                                         |  |  |           |                                                 |
| GU Device Securement Method        |                 | Physical attachment of device to prevent accidental removal, reduce trauma (to the urethra and bladder), and/or reduce inflammation of urinary tissues. |  |  | 448439004 | Catheter stabilization device (physical object) |
| Leg strap                          | Securing device | Strap used to secure a urinary catheter drainage bag to the patient's leg                                                                               |  |  | 401604001 | Catheter retainer strap (physical object)       |
| Tape                               | Securing device | Supply used to secure a urinary drainage catheter to the patient's body, usually the thigh                                                              |  |  |           |                                                 |
|                                    |                 |                                                                                                                                                         |  |  |           |                                                 |
| GU Device Site Assessment          |                 | Assessment of the bodily location when a device is in use                                                                                               |  |  |           |                                                 |

|                        |              |                                                                                                                                                                                                          |  |  |           |                                       |
|------------------------|--------------|----------------------------------------------------------------------------------------------------------------------------------------------------------------------------------------------------------|--|--|-----------|---------------------------------------|
| Bleeding               |              | Release of blood from the circulatory system                                                                                                                                                             |  |  | 131148009 | Bleeding (finding)                    |
| Blistered              |              | Small pocket of body fluid (lymph, serum, plasma, blood, or pus) within the upper layers of the skin, typically caused by forceful rubbing (friction), burning, freezing, chemical exposure or infection |  |  | 339008    | Blister (morphologic abnormality)     |
| Clean                  |              | Free from abnormal findings                                                                                                                                                                              |  |  |           |                                       |
| Dark edges             |              | Color approaching black around the edges                                                                                                                                                                 |  |  | 73112009  | Dark color (finding)                  |
| Dry                    |              | Free from moisture or liquid                                                                                                                                                                             |  |  | 13880007  | Dry (qualifier value)                 |
| Dusky                  |              | Darkish in color                                                                                                                                                                                         |  |  | 48786000  | Bluish red color (finding)            |
| Ecchymotic/<br>bruised |              | An area of discolored skin on the body                                                                                                                                                                   |  |  | 302227002 | Ecchymosis (finding)                  |
| Edema                  | Swelling     | Excess of watery fluid collecting in the cavities or tissues                                                                                                                                             |  |  | 267038008 | Edema (finding)                       |
| Erythema               | Red          | Superficial reddening of the skin                                                                                                                                                                        |  |  | 247441003 | Erythema (finding)                    |
| Excoriated             |              | Damaged part of the surface of the skin                                                                                                                                                                  |  |  | 400048001 | Excoriation (morphologic abnormality) |
| Intact                 | Normal color | Not damaged or impaired in any way                                                                                                                                                                       |  |  | 11163003  | Intact (qualifier value)              |
| Leaking                |              | Losing liquid through a crack or hole                                                                                                                                                                    |  |  | 87952002  | Leaking (qualifier value)             |
| Macerated              |              | Oversaturated skin from prolonged exposure to moisture                                                                                                                                                   |  |  | 3644009   | Macerated skin (finding)              |
| Moist                  |              | Slightly wet or damp                                                                                                                                                                                     |  |  | 17461003  | Wet (qualifier value)                 |
| Healed                 |              | Site is sound and healthy                                                                                                                                                                                |  |  |           |                                       |
| Painful                | Tender       | Affected with pain                                                                                                                                                                                       |  |  | 22253000  | Pain (finding)                        |
| Scabbed                |              | Encrusted or covered with a scab or scabs                                                                                                                                                                |  |  | 69640009  | Crust (morphologic abnormality)       |

|                                                 |        |                                                                                                                                                                                                                 |  |  |           |                                                         |
|-------------------------------------------------|--------|-----------------------------------------------------------------------------------------------------------------------------------------------------------------------------------------------------------------|--|--|-----------|---------------------------------------------------------|
| Clean, dry and intact                           |        | Site of device is free from abnormal findings, moisture or liquid and not damaged or impaired in any way                                                                                                        |  |  |           |                                                         |
| Dry dressing                                    |        | Device dressing is free from moisture or liquid                                                                                                                                                                 |  |  |           |                                                         |
| <b>Genitourinary Interventions</b>              |        | <b>Definitions: Actions to improve or maintain optimum urinary elimination</b>                                                                                                                                  |  |  |           |                                                         |
|                                                 |        |                                                                                                                                                                                                                 |  |  |           |                                                         |
| Urinary Elimination Management                  |        | Maintenance of optimum urinary elimination pattern                                                                                                                                                              |  |  |           |                                                         |
| Bladder training management                     |        | Bladder training, also known as scheduled voiding and bladder re-education is urinating at specific times of the day. It is used as a first line treatment of overactive bladder or mixed urinary incontinence. |  |  | 385969003 | Bladder training management (procedure)                 |
| Care of urinary system device                   |        | Provide care for the urinary system device                                                                                                                                                                      |  |  | 737944006 | Care of urinary catheter (regime/therapy)               |
| Collection of urine and strain for calculus     |        | Collect and strain urine to examine for urinary calculi. May be random collection or 24-hour collection.                                                                                                        |  |  | 37020001  | Collection of urine and strain for calculus (procedure) |
| Education about bladder voiding technique       |        | Education of patient/family regarding bladder training techniques.                                                                                                                                              |  |  | 704117005 | Education about bladder voiding technique (procedure)   |
| Fluid intake encouragement                      |        | Encouraging increased intake of fluids.                                                                                                                                                                         |  |  | 113148007 | Fluid intake encouragement (regime/therapy)             |
| Incontinence/ absorbent pad/ garment management | Briefs | Use of incontinence/absorbent pad to prevent skin breakdown for incontinent episodes                                                                                                                            |  |  | 718250000 | Absorbent underpad, non-sterile (physical object)       |

|                                                                  |  |                                                                                                                              |  |  |           |                                                                              |
|------------------------------------------------------------------|--|------------------------------------------------------------------------------------------------------------------------------|--|--|-----------|------------------------------------------------------------------------------|
| Irrigation of urinary bladder                                    |  | Injection of sterile fluid into bladder via urinary catheter to flush or wash out clots, sediment, or other urinary content. |  |  | 78533007  | Irrigation of urinary bladder (procedure)                                    |
| Perineal care                                                    |  | Cleanse and dry the external genitalia and anal area, and inspect for abnormalities.                                         |  |  | 385958001 | Perineal care (regime/therapy)                                               |
| Positioning accessible toileting device                          |  | Placing a toileting device close to the pateint so it is easily accessible                                                   |  |  |           | request a more general term than commode                                     |
| Positioning for urination                                        |  | optimizing bladder emptying by positioning patient e.g. sitting on toileting device                                          |  |  |           |                                                                              |
| Promotion of use of progressive muscle relaxation technique      |  | Use of muscle relaxation to promote bladder emptying                                                                         |  |  | 710124007 | Promotion of use of progressive muscle relaxation technique (procedure)      |
| Ultrasonography of urinary bladder for post-void residual volume |  | Ultrasonography measurement of residual urine in bladder after voiding. Measured in milliliters.                             |  |  | 700387001 | Ultrasonography of urinary bladder for post-void residual volume (procedure) |
| Urinary infection prevention education                           |  | Teaching patient/family about urinary infection prevention                                                                   |  |  |           | request new code (more specific)                                             |
| Urine specimen care                                              |  | Proper collection, storage and handling of a urinary specimen                                                                |  |  | 385842003 | Urine specimen care (regime/therapy)                                         |
|                                                                  |  |                                                                                                                              |  |  |           |                                                                              |
| GU Interventions for Elimination of Risk for Falling             |  | Definitions: Interventions associated with fall risk related to elimination                                                  |  |  |           |                                                                              |
| Ambulation therapy management                                    |  | Assistance with mobility (match with Fall Risk Management Interventions)                                                     |  |  | 370873006 | Ambulation therapy management (procedure)                                    |

|                                                 |  |                                                                                                                                                                 |  |  |           |                                                     |
|-------------------------------------------------|--|-----------------------------------------------------------------------------------------------------------------------------------------------------------------|--|--|-----------|-----------------------------------------------------|
| Positioning accessible toileting device         |  | Placing a toileting device close to the pateint so it is easily accessible                                                                                      |  |  |           | request term (see above)                            |
| Attend patient when up                          |  | Remaining with the patient when out of bed to toilet to decrease the risk of falling                                                                            |  |  | 313420001 | Assisting with toileting (regime/therapy)           |
| Provision of footwear                           |  | Environmental safety management for Fall Risk                                                                                                                   |  |  | 302807005 | Provision of footwear (procedure)                   |
| Positioning for urination                       |  | optimizing bladder emptying by positioning patient e.g. sitting on toileting device                                                                             |  |  |           |                                                     |
| Transfer assistive device use                   |  | Device used to help the patient transfer from one position or location to another                                                                               |  |  | 705413009 | Transfer/turning assistive device (physical object) |
| Provision of toileting aid                      |  | Assistive device to help the patient with toileting is provided                                                                                                 |  |  | 736858000 | Provision of toileting aid (procedure)              |
| Incontinence/ absorbent pad/ garment management |  | Use of incontinence/absorbent pad to prevent skin breakdown for incontinent episodes                                                                            |  |  |           |                                                     |
|                                                 |  |                                                                                                                                                                 |  |  |           |                                                     |
| Urinary Continance Strategies                   |  | Interventions to prevent or treat urinary incontinence                                                                                                          |  |  |           |                                                     |
| Provision of toileting aid                      |  | Assistive device to help the patient with toileting is provided                                                                                                 |  |  | 736858000 | Provision of toileting aid (procedure)              |
| Bladder Control Medication                      |  | Monitoring effects of bladder control medication(s), adherence to medication, side effects                                                                      |  |  | 18629005  | Administration of drug or medicament (procedure)    |
| Prevention of constipation                      |  | Exercise, drinking enough water and eating high-fiber foods can help prevent constipation which can damage the pelvic floor by straining during bowel movements |  |  | 713115004 | Prevention of constipation (procedure)              |

|                                                 |                        |                                                                                                                                                                                         |  |  |           |                                               |
|-------------------------------------------------|------------------------|-----------------------------------------------------------------------------------------------------------------------------------------------------------------------------------------|--|--|-----------|-----------------------------------------------|
| Positioning accessible toileting device         |                        | Placing a toileting device close to the pateint so it is easily accessible                                                                                                              |  |  |           |                                               |
| Fluid intake management                         |                        | Prevent excessive fluid intake e.g. Limiting fluid intake to decrease the likelihood of an incontinent episode                                                                          |  |  | 717244008 | Fluid intake management (procedure)           |
| Bladder training management                     |                        | Holding off on voiding to delay urination after getting the urge to go, with the goal of lengthening the time between trips to the toilet and retraining the bladder to hold more urine |  |  | 385969003 | Bladder training management (procedure)       |
| Promotion of bladder routine                    | Timed voiding          | Scheduling trips to the toilet to urinate rather than waiting until the bladder is full, without waiting for the urge or need to go                                                     |  |  | 710139008 | Promotion of bladder routine (procedure)      |
| Urinary incontinence care education             |                        | Education about care for urinary incontinence provided to the patient and/or family/caregiver, including avoiding food irritants (i.e. caffiene) and regular exercise                   |  |  | 408978006 | Urinary continence care education (procedure) |
| Kegel exercises                                 | Pelvic Muscle exercise | Excercises designed to strengthen the pelvic floor and urinary sphincter muscles to hold urine in the bladder longer                                                                    |  |  | 183306002 | Pelvic floor exercises (regime/therapy)       |
|                                                 |                        |                                                                                                                                                                                         |  |  |           |                                               |
| Perineal Care                                   | ? assignments          | Actions to prevent or care for skin breakdown of perineal area, itching, burning, odor, and infections                                                                                  |  |  |           |                                               |
| Incontinence/ absorbent pad/ garment management |                        | Use of incontinence/absorbent pad to prevent skin breakdown for incontinent episodes                                                                                                    |  |  |           |                                               |
| Perineal cleansing                              |                        | Cleanse and dry the external genitalia and anal area                                                                                                                                    |  |  | 385958001 | Perineal care (regime/therapy)                |
| Bathing patient in sitz bath                    |                        | Soaking the perineal area in a bathtub of warm water for 15-20 minutes                                                                                                                  |  |  | 81154005  | Bathing patient in sitz bath (procedure)      |
